# Detection of pre-microRNA with Convolutional Neural Networks

Jorge Cordero<sup>1</sup>, Vlado Menkovski<sup>1</sup> and Jens Allmer<sup>2</sup>

<sup>1</sup>Department of Mathematics and Computer Science, Eindhoven University of Technology, Eindhoven, The Netherlands

<sup>2</sup>Medical Informatics and Bioinformatics, Hochschule Ruhr West, University of Applied Sciences, Mülheim an der Ruhr, Germany

MicroRNAs (miRNAs) are small non-coding RNA sequences that have been implicated in many physiological processes. Furthermore, miRNAs have been shown to be important biomarkers for diseases and their mimics are tested as drug candidates. The experimental discovery of miRNAs is complicated because both miRNAs and their targets need to be expressed for the confirmation of functional interaction. This is difficult since miRNA expression is under spatiotemporal control. This has motivated the development of computational methods for miRNA detection. Such computational methods typically involve the characterization of candidate sequences with features designed by domain experts and the application of statistical or machine learning algorithms. While such features can successfully encode domain knowledge, feature engineering is a difficult and time-consuming task. Additionally, some engineered features pose excessive computational complexity that can hinder the large scale detection of miRNA. In contrast, advances of representation learning methods such as deep learning provide for automatic development of effective features directly from data. In this work, we propose a method that uses domain knowledge to create an efficient image representation of miRNA molecules encoding sequence, structure, and implicitly some thermodynamic information. We then use this low-level feature representation of the molecules to develop a hierarchical deep representation using a convolutional neural network model, which directly detects precursor miRNAs. With this method we achieve state-of-the-art performance on all previously used datasets. Additionally, detection is achieved in real time thereby overcoming the high computational cost for current pre-miRNA feature calculations such as p-value based ones. Finally, the encoding and modeling process opens possibilities for interpretability of the models' behavior, which may lead to novel biological interpretations of miRNA genesis and targeting.

## 1. Introduction

Mature microRNAs (miRNAs) are small noncoding RNAs 18-24 nucleotides long involved in regulating gene expression. They derive from longer RNA sequences called precursor miRNAs (pre-miRNAs) via a controlled pathway (1). These miRNAs are involved in most biological processes, ranging from cell differentiation, organ development, and angiogenesis to apoptosis (2, 3). In humans, deregulated miRNAs have been associated with cancer (4, 5), autoimmune diseases (6), and neurological disorders (5). Due to their presence in body fluids, miRNAs are considered good candidates for noninvasive biomarkers. As of today, hundreds of miRNAs

have been identified for several species and many more are predicted to exist.

There are many methods to experimentally detect miRNAs, but they are quite involved and can only detect actually expressed miRNAs. However, many miRNAs and their targets that are only expressed under specific conditions, therefore, escape detection. This has led to the development of computational methods to aid the detection of miRNAs and pre-miRNAs. Among these methods, machine learning (ML) algorithms have become widely used for pre-miRNA detection (7). These algorithms train models using features usually derived from primary sequence, secondary structure, and thermodynamic properties, or mixtures thereof, as well as mathematical transformations. The trained models are then used to detect pre-miRNAs from candidate sequences.

ML approaches rely on engineered features created by domain experts to produce quality results; however, developing relevant features is time consuming and error prone as it has major impact on the performance of ML models (8). Nonetheless, an abundance of features has been described to parameterize pre-miRNAs (9). For instance, dinucleotide frequencies (10) quantify primary sequence composition, local contiguous triplet elements (11) measure primary sequence composition and secondary structure combined, and thermodynamic properties such as enthalpy (12) quantify the stability of the secondary structure. While these features allow ML models to learn useful parameters for classification, they also restrict the amount of useful information models can access. Thus, ML practitioners frequently perform feature selection procedures to select the most informative features to train useful models. The effects of feature selection in pre-miRNA prediction have been shown in the works of (13, 14), where a large number of features are reduced to the most informative ones. Furthermore, the performance of ML models is also tied to the training and testing datasets. This effect is reported in a study of all *ab initio* pre-miRNA classification methods published previously (15).

In this work, we aim to build a pre-miRNA detection procedure that uses deep learning (DL) models. DL models automatically learn high level informative features that are used to compute the model's output by applying a series of transformations to low level weakly informative features corresponding to the model's input. DL has enabled solutions to many long-standing ML problems in domains such as image analysis, natural language processing, and speech recog-

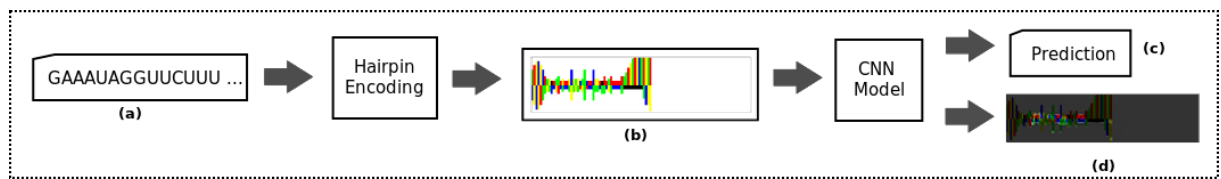

**Fig. 1.** Precursor miRNA detection framework. First, a nucleotide sequence (a) is encoded into an RGB image (b) that represents its hairpin structure. Then, using a CNN model, the corresponding label (c) is predicted. Additionally, a saliency map (d) can be computed to explore the pixels that influence the prediction.

nition. Following the success of convolutional neural networks (CNNs) on image classification challenges, such as the AlexNet (16) and ResNet (17), these DL methods have been recently applied in bioinformatics. For instance, CNNs have been used for gene expression prediction (18) and DNA sequence binding prediction (19). Most notably, DeepVariant (20) encodes sequence alignments as images that are used to train CNN models for the prediction of genetic variation. Regarding pre-miRNA prediction, the work of Do et al. (21) employs deep CNNs to identify pre-miRNAs from candidate sequences encoded as matrices containing information of primary sequence, secondary structure, and minimum free energy. The latter, although using DL, relies on hand crafted features, encoding the information into what they call pairing matrices as input for their 2D CNN.

Here, we leverage the fact that CNNs can capture localized spatial patterns and infer features based on these patterns. We propose a pre-miRNA detection framework (Figure 1) that consists of an encoding procedure that generates intermediate representations of nucleotide sequences and a CNN model that uses these representations for pre-miRNA detection. The encoding procedure (Figure 2) transforms significant characteristics of the primary sequence and secondary structure into color images that expose potential patterns in the pre-miRNA structure. These images allow domain experts to visually inspect relevant characteristics of nucleotide sequences, but more importantly, they can be used by CNNs to automatically build useful higher level features for pre-miRNA detection. Additionally, this encoding allows us to interpret the decisions made by CNNs via inspecting the corresponding saliency maps. These maps show the effect that each region (pixel) of an image has on the decision of a CNN model allowing for the interpretation of the relationship between input, image, and model decision.

We implemented our approach in the tool DeepMir, which is available at <http://www.jacorderox.com>. Additionally, CNN models ready to classify candidate pre-miRNAs and Python scripts to train CNNs on new datasets are available at <https://github.com/jacordero/deepmir>. Application of DeepMir to datasets used by Saçar et al. (15) revealed that our framework identifies pre-miRNAs of several species better than SVMs, Decision Trees, Naive Bayes models, as well as ensemble models trained using different sets of features. More importantly, DeepMir outperforms the best ML models in this work (mostly ensemble models) at classifying candidate sequences from novel datasets. The efficiency and accuracy of DeepMir for pre-miRNA detection makes it applicable to the analysis of large

eukaryotic genomes.

## 2. Materials and Methods

**Datasets.** Nucleotide sequences from various positive and negative datasets, taken from a study by Saçar et al. (15), were encoded as hairpin images to train and evaluate CNN models:

- miRBase: pre-miRNAs downloaded from the miRBase 21st release (<http://www.mirbase.com>) containing 28,596 examples from several species
- hsa: subset of miRBase containing 1,881 human pre-miRNAs
- mmu: subset of miRBase containing 1,193 mouse pre-miRNAs
- mmu\*: subset of 380 mouse pre-miRNAs extracted from miRBase with at least 100 reads per million
- MirGeneDB: set of 1,434 pre-miRNAs downloaded from <http://www.mirgenedb.org>
- hsa+: subset of 523 human pre-miRNAs extracted from MirGeneDB
- mmu+: subset of 395 mouse pre-miRNAs extracted from MirGeneDB
- gga+: subset of 229 chicken pre-miRNAs extracted from MirGeneDB
- dre+: subset of 287 zebra fish pre-miRNAs extracted from MirGeneDB
- NegHsa: negative dataset containing 68,046 unique sequences introduced by Gudys et al. (22)
- Pseudo: negative dataset composed of 8,492 pseudo pre-miRNAs proposed by Ng et al. (10)
- Shuffled: negative dataset containing 1,423 entries created by shuffling human pre-miRNAs
- Zou: negative sequences generated by applying a sample selection technique to sub-sequences obtained from coding regions of known mature miRNAs (23)
- Chen: negative examples sampled from Zou and Pseudo (24)
- NotBestFold: negative dataset containing suboptimal folds of pre-miRNAs from miRBase (15)

Using these positive and negative example datasets, we created two datasets to train CNN models for pre-miRNA detection, *modmiRBase* and *modhsa*. The *modmiRBase* dataset contains positive examples obtained from miRBase after removing duplicate sequences. The *modhsa* dataset contains only the unique human hairpin images present in *modmiR-*



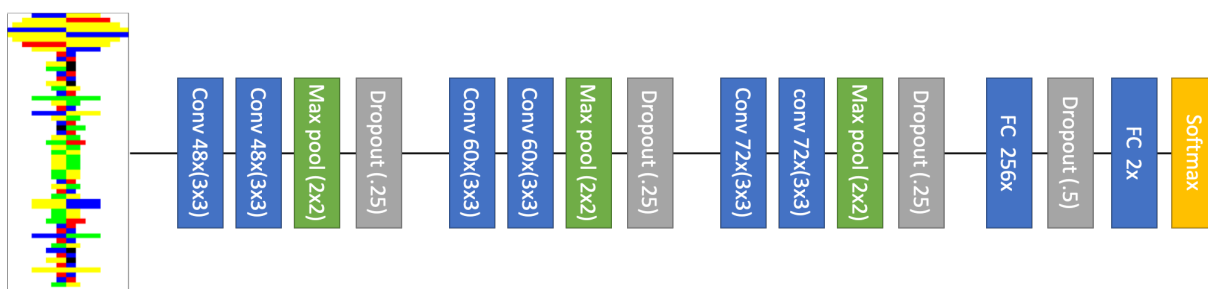

Fig. 3. Elements of the VGG-Style-3M-256FU network.

tom based architectures that use architectural ideas and components from successful models such as Visual Geometry Group (VGG) (27), GoogLeNet (28), and ResNet (17). We tested a number of models (48) that include different variations of successful practices in CNN design. The architecture of these models can be found in Tables 3 to 5, and the performance of each trained model is shown in Tables 7 to 9.

Among all designed CNNs, the model named VGG-Style-3M-256FU obtained the best performance. This CNN (depicted in Figure 3) is based on the VGG architecture and contains three convolutional modules and one fully connected module. The convolutional modules have two convolutional layers each, where each convolutional layer has a fixed number of filters (48, 60, or 72) with shape  $3 \times 3$ . Then, a max-pool layer with filter shape  $2 \times 2$  and a dropout layer follow the convolutional layers. Finally, the fully connected module maps the features obtained in the last convolutional module to the output that represent the probability of the input molecule being detected as pre-miRNA. This module is composed by a fully connected layer with 256 units, a dropout layer, and a softmax output layer.

**Saliency maps for pre-miRNA images.** The image representation of the pre-miRNA and the CNN model enable us to visualize the salient regions (pixels relevant for the decision making of the model) of those images. These salient regions indicate to which parts of the molecule our model is sensitive. We obtain saliency maps using smoothed guided backpropagation (29, 30). Sensitivity analysis such as this allows for interpretations of the behaviour of the CNN model. As DL models and other complex machine learning models are typically black-boxes, enabling interpretation poses a significant advantage for the expert evaluation of their decisions which in turn results in higher adoption rates of the model.

### 3. Experiments and Results

For the training of DL models with the architectures outlined in Figure 1 and Tables 3 to 5 positive and negative examples of pre-miRNAs are needed. As positive examples, we selected 1,830 human hairpin images and combined them with 1,830 negative example images taken from the Pseudo, Shuffled, and NegHsa datasets (610 examples from each dataset). In the following, we will refer to this dataset as the *modhsa* dataset. Since this dataset is limited in size,

but the largest available for a single species, we also develop a second, larger dataset that contains 24,801 images containing all species in miRBase as positive examples and an equal number of negative images selected from the Pseudo, Shuffled, and NegHsa datasets. We will refer to this larger dataset as *modmiRBase* in the following.

Initially, CNN models were trained using 70% of the hairpin images randomly selected from *modhsa*, while the remaining hairpin images were used for testing. These models were implemented using the Keras library (31). For training, we used the Adam (32) optimization algorithm with default values (learning rate of 0.001,  $\beta_1 = 0.9$ ,  $\beta_2 = 0.999$ ,  $\epsilon = 1^{-7}$ , and decay of 0), 100 epochs as the number of iterations over the entire training dataset, and a batch size of 128 corresponding to the number of samples used by Adam to update the CNN parameters. Training directly on the *modhsa* dataset, we achieve  $\sim 92\%$  accuracy.

The *modhsa* dataset can be considered small for training deep learning models, as they tend to perform better when trained on large datasets. For some image analysis tasks, such as digit recognition or object recognition, it is relatively easy to collect more positive examples. In contrast, in this study we were limited to previously verified pre-miRNAs. Additionally, data augmentation techniques typically used in image analysis where transformation of the image data is possible without changing the target classification are also not suitable for this case. We did, however, in our case benefit from using a transfer learning approach, i.e., we pre-trained the CNNs on different datasets and then fine-tuned the models on the *modhsa* dataset. Transfer learning typically provides advantages when restricted amounts of data are available. The strategy is to develop good low-level detectors on data with similar properties (or solving a similar task), which can then effectively be used on the target task to boot-strap the training process.

Specifically, we pre-trained the model using a subset of hairpin images from *modmiRBase* that does not contain images in *modhsa*. These subset of images contains a larger number of pre-miRNAs that share similar statistical properties to human pre-miRNAs. The pre-training procedure was performed using 40 epochs, Adam with default values, and a batch size of 128. The resulting pre-trained models were then fine-tuned using 70% of the entries in the *modhsa* dataset, and the remaining 30% were used for testing. For fine-tuning, we used 100 epochs, Adam with default values, and the same batch

**Table 1.** CNN models compared against the best ML models selected among trained instances of DTs, NBs, and SVMs trained by Saçar et al. These ML models were trained and tested using human pre-miRNAs from miRBase and negative sequences from the Pseudo dataset. The base-CNN model was trained using only the *modhsa* dataset and the fine-tuned-CNN model was pre-trained using *modhsa* and fine-tuned using *modmiRBase*.

| Model          | Number of features | Accuracy     |
|----------------|--------------------|--------------|
| fine-tuned-CNN | 2                  | <b>0.952</b> |
| base-CNN       | 2                  | 0.917        |
| Chen           | 99                 | 0.913        |
| Ng             | 29                 | 0.899        |
| Ding           | 32                 | 0.888        |
| Batuwita       | 21                 | 0.875        |
| Gudys          | 28                 | 0.874        |
| Burgt          | 18                 | 0.872        |
| Bentwich       | 26                 | 0.870        |
| Gao            | 57                 | 0.863        |
| Jiang          | 34                 | 0.862        |
| Lopes          | 13                 | 0.860        |
| Xu             | 35                 | 0.857        |
| Ritchie        | 36                 | 0.849        |
| Xue            | 32                 | 0.811        |

size.

As shown in Tables 7 to 9, the CNN models resulting from pre-training outperform the models without pre-training. Overall, the best pre-trained CNN reaches 95% accuracy while the best non pre-trained CNN only reaches 92%. The performance of our best pre-trained models and their corresponding non pre-trained versions is displayed in Table 6. From these results, we select the pre-trained VGG-Style-3M-256FU network as our best CNN model (fine-tuned-CNN).

We compare the performance of our models with existing work employing SVM, decision trees (DTs), and Naive Bayes(NB) models trained by Saçar et al. (15) using features defined in the works of Xue (11), Ng (10), Batuwita (12), and Gudys (22), among others. The balanced dataset used to train these models contains human hairpins obtained from miRBase and negative sequences sampled from the Pseudo dataset. The dataset was split 70%-30% for training and testing respectively. In the study by Saçar et al. the average performance over 1000fold MCCV for SVM, DT, and NB models was computed for varying feature sets. Here, features are automatically learned from the graphical representation. We here evaluated a large number of models by training and testing CNNs derived from different architectures and picked a model in that process. Since many models are not achieving good performance and because this is not an inherent discriminator for the other models, we present the best model instead of the average model accuracy. The accuracy values of the selected ML models, our best CNN, and the corresponding CNN without pre-training (base-CNN), are shown in Table 1. We observe a considerable difference in performance between the best ML model (Chen) and the fine-tuned-CNN. These results suggest that CNNs can learn to extract relevant features from the hairpin images and develop accurate detection model for pre-miRNAs.

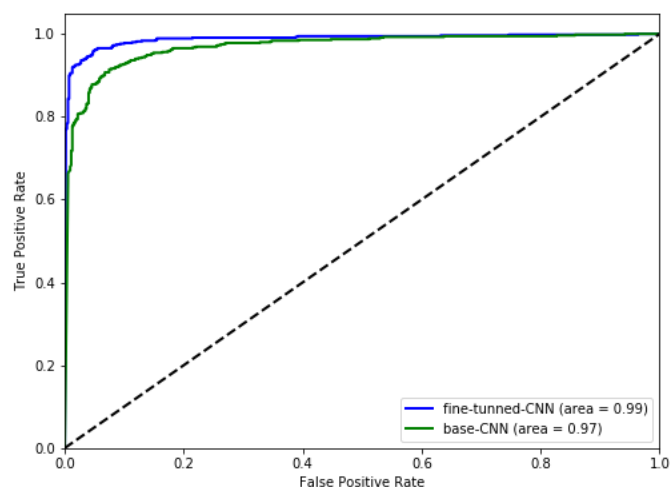

**Fig. 4.** ROC curves for for fine-tuned-CNN and base-CNN. The area under the curve for both models shows they have an excellent performance predicting positive and negative pre-miRNAs.

ROC curves computed for both CNNs (see Figure 4) show that the fine-tuned-CNN excels at discriminating between positive and negative examples. Hence, in case we need to trade accuracy to reduce the false positive rate, this model could still perform similar to the best ML models from Table 1. Additionally, the ROC curves also indicate that our models excel at identifying negative examples, which is expected because both models were trained using balanced datasets.

Models for pre-miRNA detection are expected to identify novel pre-miRNAs. Due to the nature of our study, we could not validate that our framework can detect unknown pre-miRNAs using experimental methods as done for example by Bentwich and colleagues (33). Instead, as done in most studies concerned with pre-miRNA prediction (e.g., (14, 34)), we used several positive and negative datasets to observe the performance of our CNNs when applied to previously unseen hairpin images. We consider that if our models perform well at classifying unseen nucleotide sequences, they should perform equally well with novel pre-miRNAs. Therefore, we evaluated our models using several positive and negative datasets and compared their performance against the best two ensemble models employed by Saçar et al. ( $Average_{DT}$  and  $Consensus_{NB}$ ). The results shown in Table 2 indicate that the four models are better at predicting positive sequences than negative ones. For instance, all models obtain a true negative rate lower than 0.6 on the Zou dataset (the most difficult negative dataset for both CNNs, but also for all ML approaches). On the contrary, although *mmu* appears to be a difficult positive dataset for both ML models, the CNNs perform well on this dataset. Overall, our CNNs obtain an excellent performance on positive and negative datasets. By looking at the average accuracy, we observe that both CNNs perform better than existing ensemble-based models. Saçar et al. previously noted, that with higher data quality ( $mmu < mmu^* < mmu+$ ) true positive and true negative prediction rates improve (15) and the same can be observed for CNN performance.

To further evaluate our CNN model, we selected the organ-

**Table 2.** Successful detection of non pre-miRNA for negative datasets and pre-miRNA for positive datasets. Average<sub>DT</sub> and Consensus<sub>NB</sub> are the best two ensemble models from Saçar et al. The fine-tuned-CNN and base-CNN models correspond to the VGG-Style-3M-256FU network with and without pre-training respectively.

| Model                   | Negative datasets |            |               |                    |                 |             | Positive datasets |            |             |                |                  |             |             |             |             |
|-------------------------|-------------------|------------|---------------|--------------------|-----------------|-------------|-------------------|------------|-------------|----------------|------------------|-------------|-------------|-------------|-------------|
|                         | <i>NegHsa</i>     | <i>Zou</i> | <i>Pseudo</i> | <i>NotBestFold</i> | <i>Shuffled</i> | <i>Chen</i> | <i>hsa</i>        | <i>mmu</i> | <i>mmu*</i> | <i>miRBase</i> | <i>MirGeneDB</i> | <i>hsa+</i> | <i>mmu+</i> | <i>gga+</i> | <i>dre+</i> |
| fine-tuned-CNN          | <b>97</b>         | 26         | 91            | <b>97</b>          | <b>99</b>       | 65          | <b>98</b>         | <b>93</b>  | <b>97</b>   | <b>93</b>      | <b>100</b>       | <b>100</b>  | <b>99</b>   | <b>100</b>  | <b>100</b>  |
| base-CNN                | 93                | 43         | 74            | <b>97</b>          | 96              | 62          | <b>98</b>         | 91         | 95          | 82             | 99               | 99          | 98          | 99          | 99          |
| Average <sub>DT</sub>   | 82                | <b>56</b>  | <b>93</b>     | 31                 | 93              | <b>77</b>   | 97                | 83         | 95          | 91             | 97               | 98          | 96          | 98          | 96          |
| Consensus <sub>NB</sub> | 89                | 52         | 86            | 24                 | 96              | <b>77</b>   | 86                | 82         | 93          | 89             | 96               | 96          | 93          | 98          | 97          |

isms having at least 200 entries in the complete miRBase dataset, and used these examples to compute true positive rate (TPR) values per organism. The resulting TPR values for the fine-tuned-CNN and both ensemble models are depicted in Figure 5. We observe that the fine-tuned-CNN outperforms the other models for most of the organisms. Among the 44 selected organisms, the fine-tuned-CNN achieves the highest accuracy on 33 of them. Note that all models achieve lower performance classifying *tca*, *ame*, and *bmo*. But even for these organisms, fine-tuned-CNN still obtains a reasonable performance, while for *bmo*, the other three models perform like a random classifier. Perhaps this performance could be related to the use of miRBase data during the fine-tuned-CNN pre-training. Nonetheless, this network still outperforms both ML models on previously unseen data such as MirGeneDB and NotBestFold.

To understand the decision making process of our model in respect to the locations in the hairpin structure, we produce average saliency maps of the true positives (Figure 6) and true negatives (Figure 7). These images show that the CNN focuses on different regions to predict true pre-miRNAs and false pre-miRNAs. The central pixels are important for positive hairpin images, while top and central pixels are important for negative images. From a biological point of view these images give us a certain level of sanity check. We see that our model is not sensitive to the hairpin loop that is present in both positive and negative images. This seems to be contrary to the biological understanding that a pre-miRNA must have a terminal loop, however, any RNA structure that folds back on itself must have a terminal loop and, therefore, the negative examples all have terminal loops, therefore this feature is not discriminative for the given data. We also see that the model is not sensitive to regions of the image that are not representing parts of the miRNA molecule such as the edges. This give us a certain level of confidence that our model behaves as expected, however, we leave a more in-depth analysis of the behavior towards developing explicit interpretations to future work.

## 4. Discussion

In our experimental study, both proposed CNN models outperform the ensemble models proposed in izMiR, for the

NegHsa, NotBestFold, Shuffled, MirGeneDB, *mmu*, *mmu+*, and *dre+* datasets (Table 2). We achieve similar performance for Pseudo and perform worse only on Chen and Zou. The performance, particularly stands out on NotBestFold dataset, which can be explained by the direct encoding of structure in the images. Sub-optimal folds often do not resemble pre-miRNAs and are, therefore, correctly rejected by both CNNs. On average, fine-tuned-CNN performs better than the other models. Thus, DeepMir uses this model for nucleotide sequence classification.

The results also demonstrate that transfer learning can be used for developing models for other species that have a small number of known pre-miRNAs. In principle, we could select any valid pre-miRNA for the pre-training procedure. Therefore, we should be able to generate CNN models for organisms that have enough pre-miRNAs to perform the fine-tuning procedure. The resulting models could be used on the DeepMir framework, as it allows for the usage of different CNNs. Hence, when necessary, new models could be incorporated to DeepMir.

Besides having excellent performance, one of the main advantage of this approach is that the detection can be done with significantly lower computational complexity than other methods that rely on engineered features. To detect a pre-miRNA sequence we execute two steps; the encoding of the hairpin image and the detection with the neural network. The hairpin encoding algorithm only runs RNAfold once per sequence. All other calculations are significantly simpler. In contrast, several of the ML features are based on statistics and need to rerun RNAfold for the randomly shuffled sequence up to a thousand times with additional feature calculations which may not be trivial (9, 10). For some sequences it may not be possible to create a thousand different sequences. Taken together, some features take a thousand fold longer to be created than an image; and for sequences some additional runtime may be required since a thousand different randomly shuffled sequences cannot be created. The detection with the neural network model is very efficient. The computational complexity of such models scales linearly with the number of neurons and the size of the input. As both of these values are fairly small for today's computational resources this step is very quick. Furthermore, the execution of the model is highly parallelizable and can be significantly accelerated on

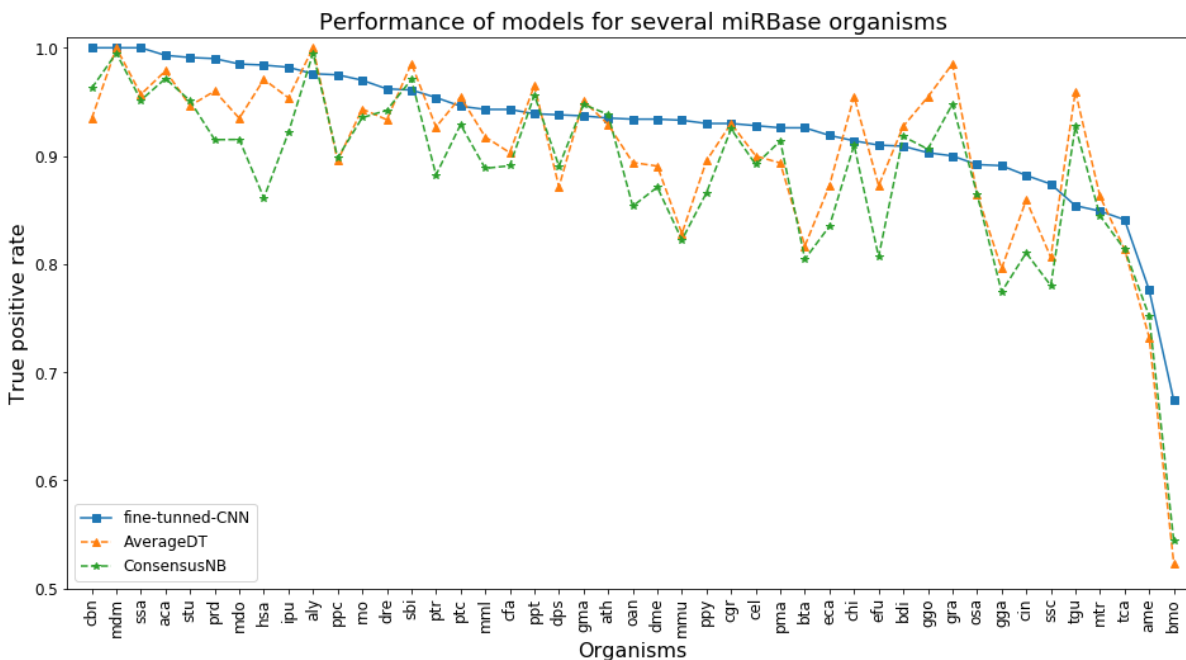

**Fig. 5.** Image that shows the performance of CNN models and ML models identifying pre-miRNAs from organisms that have at least 200 entries in the miRBase dataset. The plot shows that both CNN models outperform the ensemble models for most of the organisms. For some organisms such as tca, ame, and bmo, pre-miRNAs are difficult to identify. While the ML model appear to be no different than random selection methods for these organisms, our CNNs show that they are able to learn features for pre-miRNA detection as their worse performance is close to 0.7.

suitable hardware.

Overall, the lower computational time required to encode hairpin images makes our pre-miRNA detection framework a feasible choice for even large eukaryotic genomes with millions of putative hairpins.

## 5. Conclusions

MicroRNAs are important in gene regulation and contribute to cell homeostasis. Their dysregulation is a hallmark of disease. However, miRNA and their target detection is experimentally complicated since both are under spatiotemporal control. Therefore, computational methods are important to detect miRNAs and their targets.

We addressed the task of pre-miRNA detection using a deep learning based framework whose key components are a novel hairpin image encoding algorithm and a custom CNN model. To this end, we first encode the primary sequence and secondary structure of nucleotide sequences into RGB images that display spatial patterns and implicitly encode thermodynamics. Then, CNN models are used to classify these images as pre-miRNA or other.

By using this framework, we avoid time consuming feature selection procedures used in ML methods for pre-miRNA detection. When compared against ML pre-miRNA detection methods, our framework outperforms these methods in most of the positive and negative datasets used for evaluation. Therefore, we conclude that this framework can be used

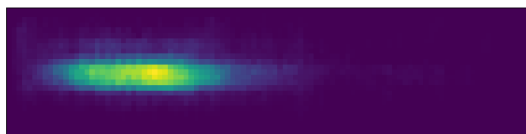

**Fig. 6.** Average saliency map computed from *modhsa* entries accurately classified as pre-miRNAs. Central pixels (possibly strong bonds) are more relevant for the CNN model than others.

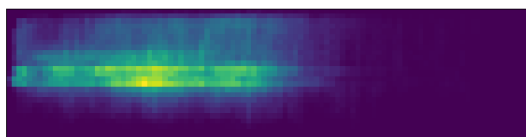

**Fig. 7.** Average saliency map computed from *modhsa* entries accurately classified as non pre-miRNAs. Besides central pixels, loop regions are also considered to classify hairpin images.

for the prediction of novel pre-miRNAs. Additionally, average saliency maps show that our CNN models are able to focus on different regions to distinguish between true and false pre-miRNA examples. For this, further study is required in order to identify how these regions are related to biological structures of pre-miRNAs and whether they are different for different species, classes, or kingdoms.

Even though we achieved state-of-the-art performance, we believe that there may be room for future improvement of both the hairpin encoding algorithm and the CNN models. Specifically, the hairpin algorithm can be extended to incorporate more domain knowledge and accordingly more complex CNN models can be developed for such encodings.

We hope that the exceptional performance of our fine-tuned CNN model and its applicability for a wide range of species and even for large genomes will enable others to confidently perform pre-miRNA prediction.

## References

1. Ayse Elif Erson-Bensan. *Introduction to MicroRNAs in Biological Systems*, pages 1–14. Humana Press, Totowa, NJ, 2014. ISBN 978-1-62703-748-8. doi: 10.1007/978-1-62703-748-8\_1.
2. Yong Huang, Xing-Jia Shen, Quan Zou, Sheng Peng Wang, Shun Ming Tang, and Guo Zheng Zhang. Biological functions of MicroRNAs: A review. *Journal of physiology and biochemistry*, 67:129–39, 10 2010. doi: 10.1007/s13105-010-0050-6.
3. Hamid Hamzeiy, Rabia Suluyayla, Christoph Brinkrolf, Sebastian Jan Janowski, Ralf Hofestädt, and Jens Allmer. Visualization and Analysis of miRNAs Implicated in Amyotrophic Lateral Sclerosis Within Gene Regulatory Pathways. *Studies in health technology and informatics*, 253:183–187, 01 2018. doi: 10.3233/978-1-61499-896-9-183.
4. Reinhold Munker and George A. Calin. MicroRNA profiling in cancer. *Clinical Science*, 121(4):141–158, 2011. ISSN 0143-5221. doi: 10.1042/CS20110005.
5. Enrico De Smaele, Elisabetta Ferretti, and Alberto Gulino. MicroRNAs as biomarkers for CNS cancer and other disorders. *Brain Research*, 1338:100–111, 2010. ISSN 0006-8993. doi: <https://doi.org/10.1016/j.brainres.2010.03.103>.
6. Victoria Furer, Jeffrey D. Greenberg, Mukundan Attur, Steven B. Abramson, and Michael H. Pillinger. The role of microRNA in rheumatoid arthritis and other autoimmune diseases. *Clinical Immunology*, 136(1):1–15, 2010. ISSN 1521-6616. doi: <https://doi.org/10.1016/j.clim.2010.02.005>.
7. Müşerref Duygu Saçar and Jens Allmer. *Machine Learning Methods for MicroRNA Gene Prediction*, pages 177–187. Humana Press, Totowa, NJ, 2014. ISBN 978-1-62703-748-8. doi: 10.1007/978-1-62703-748-8\_10.
8. Y. Bengio, A. Courville, and P. Vincent. Representation Learning: A Review and New Perspectives. *IEEE Transactions on Pattern Analysis and Machine Intelligence*, 35(8):1798–1828, Aug 2013. ISSN 0162-8828. doi: 10.1109/TPAMI.2013.50.
9. M. D. Saçar and J. Allmer. Data mining for microrna gene prediction: On the impact of class imbalance and feature number for microrna gene prediction. In *2013 8th International Symposium on Health Informatics and Bioinformatics*, pages 1–6, Sep. 2013. doi: 10.1109/HIBIT.2013.6661685.
10. Kwang Loong Stanley Ng and Santosh K. Mishra. De novo SVM classification of precursor microRNAs from genomic pseudo hairpins using global and intrinsic folding measures. *Bioinformatics*, 23(11):1321–1330, 2007. doi: 10.1093/bioinformatics/btm026.
11. Chenghai Xue, Fei Li, Tao He, Guo-Ping Liu, Yanda Li, and Xuegong Zhang. Classification of real and pseudo microRNA precursors using local structure-sequence features and support vector machine. *BMC Bioinformatics*, 6(1):310, Dec 2005. ISSN 1471-2105. doi: 10.1186/1471-2105-6-310.
12. Rukshan Batuwita and Vasile Palade. microPred: effective classification of pre-miRNAs for human miRNA gene prediction. *Bioinformatics*, 25(8):989–995, 2009. doi: 10.1093/bioinformatics/btp107.
13. W. Khalifa, M. Yousef, M. D. Saçar Demirci, and J Allmer. The impact of feature selection on one and two-class classification performance for plant microRNAs. *PeerJ*, e2135:183–187, 04 2016. doi: 10.7717/peerj.2135.
14. Ivani de ON Lopes, Alexander Schliep, and André CP de LF de Carvalho. The discriminant power of RNA features for pre-miRNA recognition. *BMC Bioinformatics*, 15(1):124, May 2014. ISSN 1471-2105. doi: 10.1186/1471-2105-15-124.
15. Duygu Saçar, Jan Baumbach, and Jens Allmer. On the performance of pre-microRNA detection algorithms. *Nature Communications*, 8, Dec 2017. doi: 10.1038/s41467-017-00403-z.
16. Alex Krizhevsky, Ilya Sutskever, and Geoffrey E. Hinton. ImageNet Classification with Deep Convolutional Neural Networks. In *Proceedings of the 25th International Conference on Neural Information Processing Systems - Volume 1, NIPS’12*, pages 1097–1105, USA, 2012. Curran Associates Inc.
17. Kaiming He, Xiangyu Zhang, Shaoqing Ren, and Jian Sun. Deep Residual Learning for Image Recognition. *CoRR*, abs/1512.03385, 2015.
18. Ritambhara Singh, Jack Lanchantin, Gabriel Robins, and Yanjun Qi. DeepChrome: deep-learning for predicting gene expression from histone modifications. *Bioinformatics*, 32(17):i639–i648, 2016. doi: 10.1093/bioinformatics/btw427.
19. Haoyang Zeng, Matthew D. Edwards, Ge Liu, and David K. Gifford. Convolutional neural network architectures for predicting DNA–protein binding. *Bioinformatics*, 32(12):i121–i127, 2016. doi: 10.1093/bioinformatics/btw255.
20. Ryan Poplin, Pi-Chuan Chang, David Alexander, Scott Schwartz, Thomas Colthurst, Alexander Ku, Dan Newburger, Jojo Dijamco, Nam Nguyen, Pegah Tootoonchi Afshar, Sam Gross, Lizzie Dorfman, Cory Y McLean, and Mark A. DePristo. A universal SNP and small-indel variant caller using deep neural networks. *Nature Biotechnology*, 36:983–987, 2018.
21. Binh Thanh Do, Vladimir Golkov, Göktuğ Erce Gürel, and Daniel Cremers. Precursor microRNA Identification Using Deep Convolutional Neural Networks. *bioRxiv*, 2018. doi: 10.1101/414656. 10.1101/414656, 16-September-2018, pre-print: not peer reviewed.
22. Adam Gudyś, Michał Wojciech Szcześniak, Marek Sikora, and Izabela Makatowska. HuntMi: an efficient and taxon-specific approach in pre-miRNA identification. *BMC Bioinformatics*, 14(1):83, Mar 2013. ISSN 1471-2105. doi: 10.1186/1471-2105-14-83.
23. L. Wei, M. Liao, Y. Gao, R. Ji, Z. He, and Q. Zou. Improved and Promising Identification of Human MicroRNAs by Incorporating a High-Quality Negative Set. *IEEE/ACM Transactions on Computational Biology and Bioinformatics*, 11(1):192–201, Jan 2014. ISSN 1545-5963. doi: 10.1109/TCBB.2013.146.
24. Junjie Chen, Xiaolong Wang, and Bin Liu. iMiRNA-SSF: Improving the Identification of MicroRNA Precursors by Combining Negative Sets with Different Distributions. *Scientific Reports*, 6:19062, Jan 2016. doi: 10.1038/srep19062.
25. Gary M. Weiss. Mining with Rarity: A Unifying Framework. *SIGKDD Explor. Newsl.*, 6(1):7–19, June 2004. ISSN 1931-0145. doi: 10.1145/1007730.1007734.
26. Ivo L. Hofacker. The Vienna RNA Secondary Structure Server. *Nucleic Acids Res*, 31:3429–3431, 2003.
27. Karen Simonyan and Andrew Zisserman. Very Deep Convolutional Networks for Large-Scale Image Recognition. *CoRR*, abs/1409.1556, 2014.
28. C. Szegedy, Wei Liu, Yangqing Jia, P. Sermanet, S. Reed, D. Anguelov, D. Erhan, V. Vanhoucke, and A. Rabinovich. Going deeper with convolutions. In *2015 IEEE Conference on Computer Vision and Pattern Recognition (CVPR)*, pages 1–9, June 2015. doi: 10.1109/CVPR.2015.7298594.
29. Daniel Smilkov, Nikhil Thorat, Been Kim, Fernanda B. Viégas, and Martin Wattenberg. SmoothGrad: removing noise by adding noise. *CoRR*, abs/1706.03825, 2017.
30. Jost Tobias Springenberg, Alexey Dosovitskiy, Thomas Brox, and Martin A. Riedmiller. Striving for Simplicity: The All Convolutional Net. *CoRR*, abs/1412.6806, 2014.
31. François Chollet et al. Keras. <https://keras.io>, 2015.
32. Diederik P. Kingma and Jimmy Ba. Adam: A Method for Stochastic Optimization. *arXiv e-prints*, art. arXiv:1412.6980, Dec 2014.
33. Isaac Bentwich, Amir Avniel, Yael Karov, Ranit Aharonov, Shlomit Gilad, Omer Barad, Adi Barzilai, Paz Einat, Uri Einav, Eti Meiri, Eilon



- Sharon, Yael Spector, and Zvi Bentwich. Identification of hundreds of conserved and nonconserved human microRNAs. *Nature Genetics*, 37(7):766–770, 2005. ISSN 1546-1718. doi: 10.1038/ng1590.
34. William Ritchie, Dadi Gao, and John E. J. Rasko. Defining and providing robust controls for microRNA prediction. *Bioinformatics*, 28(8):1058–1061, 03 2012. ISSN 1367-4803. doi: 10.1093/bioinformatics/bts114.
  35. Kaiming He, Xiangyu Zhang, Shaoqing Ren, and Jian Sun. Deep Residual Learning for Image Recognition. *CoRR*, abs/1512.03385, 2015.
  36. Kaiming He, Xiangyu Zhang, Shaoqing Ren, and Jian Sun. Identity Mappings in Deep Residual Networks. *CoRR*, abs/1603.05027, 2016.

## Appendix

**A. CNN architectures.** The networks described in Tables 3 to 5 were implemented using the Keras deep learning framework, and their code is available at <https://github.com/jacordero/deepmir/>. The code includes scripts to design and train VGG-Style, Inception-Style, and ResNet-Style models.

**Table 3.** Structure of CNNs that were designed based on the VGG architecture (27). The table shows the structure of VGG-Style networks with up to four convolutional modules (VGG-Style-4M). Each convolutional module is made of two convolutional layers using filter size of  $3 \times 3$  and the same number of filters (48, 60, 72, or 84) followed by a maxpool layer and a dropout layer. The end of the networks consist of a fully connected module made of a fully connected layer containing a certain number of fully connected units FU (32, 64, 128, or 256) followed by a dropout layer and a softmax layer with two output units (pre-miRNA and non pre-miRNA respectively). In total, we can create 16 different CNNs for a given dataset: four different VGG-Style networks with four different values for the FU parameter.

| VGG-Style-1M  |                           | VGG-Style-2M  |                           | VGG-Style-3M  |                           | VGG-Style-4M  |                           |
|---------------|---------------------------|---------------|---------------------------|---------------|---------------------------|---------------|---------------------------|
| Layer         | Params                    | Layer         | Params                    | Layer         | Params                    | Layer         | Params                    |
| Convolutional | $(3 \times 3, 48 \times)$ | Convolutional | $(3 \times 3, 48 \times)$ | Convolutional | $(3 \times 3, 48 \times)$ | Convolutional | $(3 \times 3, 48 \times)$ |
| Convolutional | $(3 \times 3, 48 \times)$ | Convolutional | $(3 \times 3, 48 \times)$ | Convolutional | $(3 \times 3, 48 \times)$ | Convolutional | $(3 \times 3, 48 \times)$ |
| Maxpool       | $(2 \times 2)$            | Maxpool       | $(2 \times 2)$            | Maxpool       | $(2 \times 2)$            | Maxpool       | $(2 \times 2)$            |
| Dropout       | 0.25                      | Dropout       | 0.25                      | Dropout       | 0.25                      | Dropout       | 0.25                      |
| Flatten       |                           | Convolutional | $(3 \times 3, 60 \times)$ | Convolutional | $(3 \times 3, 60 \times)$ | Convolutional | $(3 \times 3, 48 \times)$ |
| FC            | $(FU \times)$             | Convolutional | $(3 \times 3, 60 \times)$ | Convolutional | $(3 \times 3, 60 \times)$ | Convolutional | $(3 \times 3, 48 \times)$ |
| Dropout       | 0.5                       | Maxpool       | $(2 \times 2)$            | Maxpool       | $(2 \times 2)$            | Maxpool       | $(2 \times 2)$            |
| Softmax       | $(2 \times)$              | Dropout       | 0.25                      | Dropout       | 0.25                      | Dropout       | 0.25                      |
|               |                           | Flatten       |                           | Convolutional | $(3 \times 3, 72 \times)$ | Convolutional | $(3 \times 3, 72 \times)$ |
|               |                           | FC            | $(FU \times)$             | Convolutional | $(3 \times 3, 72 \times)$ | Convolutional | $(3 \times 3, 72 \times)$ |
|               |                           | Dropout       | 0.5                       | Maxpool       | $(2 \times 2)$            | Maxpool       | $(2 \times 2)$            |
|               |                           | Softmax       | $(2 \times)$              | Dropout       | 0.25                      | Dropout       | 0.25                      |
|               |                           |               |                           | Flatten       |                           | Convolutional | $(3 \times 3, 84 \times)$ |
|               |                           |               |                           | FC            | $(FU \times)$             | Convolutional | $(3 \times 3, 84 \times)$ |
|               |                           |               |                           | Dropout       | 0.5                       | Maxpool       | $(2 \times 2)$            |
|               |                           |               |                           | Softmax       | $(2 \times)$              | Dropout       | 0.25                      |
|               |                           |               |                           |               |                           | Flatten       |                           |
|               |                           |               |                           |               |                           | FC            | $(FU \times)$             |
|               |                           |               |                           |               |                           | Dropout       | 0.5                       |
|               |                           |               |                           |               |                           | Softmax       | $(2 \times)$              |

**Table 4.** Structure of CNNs with up to four modules that were designed based on the Inception architecture (28). The first layer of each network is a convolutional layer with 64 filters of shape  $3 \times 3$  used to extract low level features. The Inception modules, used to extract spatial patterns at different resolutions, have the structure shown in Figure 8. This Inception module has convolutional layers with different filter shape that the ones presented in the original GoogLeNet, the maxpool layer also differs. All the convolutional layers inside the Inception modules have the same number of filters (CK), which can take four different values: 8, 12, 16, and 20. In total, we can create 16 different CNNs for a given dataset: four different Inception-Style networks with four different values for the CK parameter.

| Inception-Style-1M |                           | Inception-Style-2M |                           | Inception-Style-3M |                           | Inception-Style-4M |                           |
|--------------------|---------------------------|--------------------|---------------------------|--------------------|---------------------------|--------------------|---------------------------|
| Layer/Module       | Params                    | Layer/Module       | Params                    | Layer/Module       | Params                    | Layer/Module       | Params                    |
| Convolutional      | $(64 \times, 3 \times 3)$ | Convolutional      | $(64 \times, 3 \times 3)$ | Convolutional      | $(64 \times, 3 \times 3)$ | Convolutional      | $(64 \times, 3 \times 3)$ |
| Inception          | $(CK \times)$             | Inception          | $(CK \times)$             | Inception          | $(CK \times)$             | Inception          | $(CK \times)$             |
| Flatten            |                           | Inception          | $(CK \times)$             | Inception          | $(CK \times)$             | Inception          | $(CK \times)$             |
| Softmax            | $(2 \times)$              | Flatten            |                           | Inception          | $(CK \times)$             | Inception          | $(CK \times)$             |
|                    |                           | Softmax            | $(2 \times)$              | Flatten            |                           | Inception          | $(CK \times)$             |
|                    |                           |                    |                           | Softmax            | $(2 \times)$              | Flatten            |                           |
|                    |                           |                    |                           |                    |                           | Softmax            | $(2 \times)$              |

**Table 5.** Structure of CNNs with up to four modules that were designed based on the ResNet architecture (35) using fully-preactivated units (36). The first layer of each network is a convolutional layer with 32 filters of shape  $3 \times 3$  used to extract low level features. The ResNet modules have convolutional layers with a filter shape of  $3 \times 3$ . The number of filters in the convolutional layers is given by the parameter CK that can take four different values: 20, 24, 28, and 32. The GPA layer corresponds to a global average pooling layer that maps 3D feature maps to 1D vectors. The units of such vectors are then connected to the softmax units to produce the output of the network. In total, we can create 16 different CNNs for a given dataset: four different ResNet-Style networks with four different values for the CK parameter.

| ResNet-Style-1M |                           | ResNet-Style-2M |                           | ResNet-Style-3M |                           | ResNet-Style-4M |                           |
|-----------------|---------------------------|-----------------|---------------------------|-----------------|---------------------------|-----------------|---------------------------|
| Layer/Module    | Params                    | Layer/Module    | Params                    | Layer/Module    | Params                    | Layer/Module    | Params                    |
| Convolutional   | $(32 \times, 3 \times 3)$ | Convolutional   | $(32 \times, 3 \times 3)$ | Convolutional   | $(32 \times, 3 \times 3)$ | Convolutional   | $(32 \times, 3 \times 3)$ |
| ResNet          | $(32 \times, 3 \times 3)$ | ResNet          | $(32 \times, 3 \times 3)$ | ResNet          | $(32 \times, 3 \times 3)$ | ResNet          | $(32 \times, 3 \times 3)$ |
| GPA             |                           | ResNet          | $(32 \times, 3 \times 3)$ | ResNet          | $(32 \times, 3 \times 3)$ | ResNet          | $(32 \times, 3 \times 3)$ |
| Softmax         | $(2 \times)$              | GPA             |                           | ResNet          | $(32 \times, 3 \times 3)$ | ResNet          | $(32 \times, 3 \times 3)$ |
|                 |                           | Softmax         | $(2 \times)$              | GPA             |                           | ResNet          | $(32 \times, 3 \times 3)$ |
|                 |                           |                 |                           | Softmax         | $(2 \times)$              | GPA             |                           |
|                 |                           |                 |                           |                 |                           | Softmax         | $(2 \times)$              |

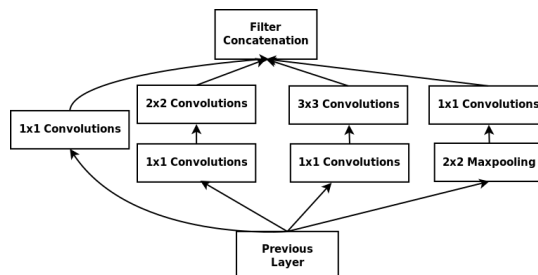

**Fig. 8.** Inception module designed for pre-miRNA detection. It follows a similar structure to the original inception module presented in the GoogLeNet network, but it uses different filter shapes for the convolutional and maxpool layers. The convolutional layers have filters with shape  $1 \times 1$ ,  $2 \times 2$ , and  $3 \times 3$ , while the maxpool layer has filter shape of  $2 \times 2$ .

**B. CNNs performance.** Table 6 shows the accuracy of the best ten CNN models trained using transfer learning and their corresponding versions without pre-training. Even though 48 different models were trained following the VGG-Style, Inception-Style, and ResNet-Style defined in the tables above, only VGG-Style models belong to the top ten models. The models are sorted according to their average accuracy on both datasets. Tables 7 to 9 show the accuracy of VGG-Style, Inception-Style, and ResNet-Style models respectively. The accuracy of the best models is emphasized in bold.

**Table 6.** Accuracy of top ten pre-trained CNN models including VGG-Style, Inception-Style, and ResNet-Style models sorted by their accuracy. The corresponding non pre-trained models are also included to observe the benefits of pre-training. Only VGG-Style models belong to the top ten CNNs.

| CNN                | With pre-training | Without pre-training |
|--------------------|-------------------|----------------------|
| VGG-Style-3M-256FU | <b>0.9517</b>     | 0.9171               |
| VGG-Style-1M-128FU | 0.9472            | 0.8934               |
| VGG-Style-3M-128FU | 0.9472            | 0.8907               |
| VGG-Style-1M-64FU  | 0.9454            | 0.8889               |
| VGG-Style-3M-64FU  | 0.9454            | 0.8807               |
| VGG-Style-2M-256FU | 0.9426            | 0.9180               |
| VGG-Style-4M-128FU | 0.9426            | 0.9199               |
| VGG-Style-1M-32FU  | 0.9417            | 0.9044               |
| VGG-Style-1M-256FU | 0.9408            | 0.8962               |
| VGG-Style-4M-256FU | 0.9408            | 0.9089               |

**Table 7.** Accuracy of 16 VGG-Style networks trained with and without pre-training. The *modhsa* test dataset is used to evaluate the performance of all trained networks. For pre-trained networks, VGG-Style-3M-256FU has the best performance, while for non pre-trained networks, VGG-Style-2M-128FU and VGG-Style-4M-128FU achieve the best performance.

| CNN          | Without pre-training |        |               |        | With pre-training |        |        |               |
|--------------|----------------------|--------|---------------|--------|-------------------|--------|--------|---------------|
|              | 32FU                 | 64FU   | 128FU         | 256FU  | 32FU              | 64FU   | 128FU  | 256FU         |
| VGG-Style-1M | 0.9044               | 0.8889 | 0.8934        | 0.8962 | 0.9417            | 0.9454 | 0.9472 | 0.9408        |
| VGG-Style-2M | 0.9162               | 0.9144 | <b>0.9199</b> | 0.9180 | 0.9390            | 0.9390 | 0.9381 | 0.9426        |
| VGG-Style-3M | 0.8989               | 0.8807 | 0.8907        | 0.9171 | 0.9362            | 0.9454 | 0.9472 | <b>0.9517</b> |
| VGG-Style-4M | 0.9162               | 0.9089 | <b>0.9199</b> | 0.9089 | 0.9244            | 0.9381 | 0.9426 | 0.9408        |

**Table 8.** Accuracy of 16 Inception-Style networks trained with and without pre-training. The *modhsa* test dataset is used to evaluate the performance of all trained networks. For pre-trained networks, Inception-Style-2M-8CK has the best performance, while for non pre-trained networks, Inception-Style-2M-16CK achieves the best performance.

| CNN                | Without pre-training |        |               |        | With pre-training |        |        |        |
|--------------------|----------------------|--------|---------------|--------|-------------------|--------|--------|--------|
|                    | 8CK                  | 12CK   | 16CK          | 20CK   | 8CK               | 12CK   | 16CK   | 20CK   |
| Inception-Style-1M | 0.8843               | 0.8880 | 0.5000        | 0.5000 | 0.9311            | 0.9299 | 0.9344 | 0.5000 |
| Inception-Style-2M | 0.8907               | 0.8807 | <b>0.8953</b> | 0.8852 | <b>0.9353</b>     | 0.5000 | 0.9290 | 0.9290 |
| Inception-Style-3M | 0.8834               | 0.8916 | 0.8880        | 0.5000 | 0.9235            | 0.9271 | 0.9335 | 0.9281 |
| Inception-Style-4M | 0.8871               | 0.8843 | 0.8934        | 0.8862 | 0.9281            | 0.9235 | 0.9262 | 0.9226 |

**Table 9.** Accuracy of 16 ResNet networks trained with and without pre-training. The *modhsa* test dataset is used to evaluate the performance of all trained networks. For pre-trained networks, ResNet-Style-1M-24CK has the best performance, while for non pre-trained networks, ResNet-Style-3M-24CK achieves the best performance.

| CNN             | Without pre-training |               |        |        | With pre-training |               |        |        |
|-----------------|----------------------|---------------|--------|--------|-------------------|---------------|--------|--------|
|                 | 20CK                 | 24CK          | 28CK   | 32CK   | 20CK              | 24CK          | 28CK   | 32CK   |
| ResNet-Style-1M | 0.5009               | 0.9098        | 0.9044 | 0.9135 | 0.8242            | <b>0.9208</b> | 0.5082 | 0.5337 |
| ResNet-Style-2M | 0.5055               | 0.5000        | 0.5000 | 0.5000 | 0.8780            | 0.6366        | 0.6967 | 0.8652 |
| ResNet-Style-3M | 0.5893               | <b>0.9199</b> | 0.9044 | 0.5310 | 0.9117            | 0.8470        | 0.6894 | 0.9117 |
| ResNet-Style-4M | 0.9062               | 0.8233        | 0.8925 | 0.9123 | 0.5729            | 0.8525        | 0.5337 | 0.7570 |

Genetic diversity

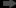

Genetic diversity  
Genetic diversity

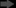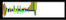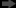

Genetic diversity  
Genetic diversity

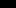

Genetic diversity

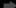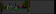



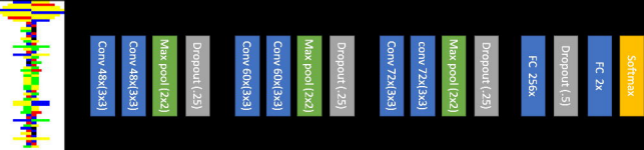

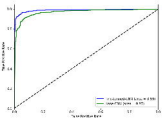



Performance of models for several mitochondria organisms

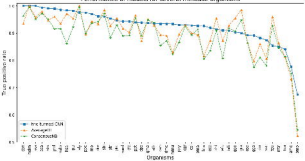

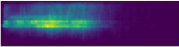

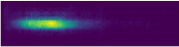

**Pillar  
Concatenation**

↓

**3x3 Convolutions**

**3x3 Convolutions**

**1x1 Convolutions**

**1x1 Convolutions**

**1x1 Convolutions**

**1x3 Convolutions**

**3x3 Maxpooling**

**Previous  
Layer**

↓
